# Supplementary material
Source: PubMed Central journal article supplement (PMC9342997)
Supplement: kiac197_supplementary_data.pdf [file kiac197_supplementary_data.pdf]

**Supplemental Table S1. Primers used in the study.**

| Description (Vectors)                            | Name               | Primer sequence                                         | Restriction enzyme |
|--------------------------------------------------|--------------------|---------------------------------------------------------|--------------------|
| Overexpression<br>(35S: P-super-1300)            | ANAC017-OX-F       | CTAGAAAGCTTCTGCAGATGGCG<br>GATTCTTCACCCGATTTCGT         | Pst I              |
|                                                  | ANAC017-OX-R       | ACTAGTATTTAAATGTCGACGTCT<br>TTCAAGAGAAGACTTCTACCT       | Sal I              |
|                                                  | XTH31-OX-F         | CTAGAAAGCTTCTGCAGATGGCT<br>TTGTCTTTATCTTTCTAG           | Pst I              |
|                                                  | XTH31-OX-R         | ACTAGTATTTAAATGTCGACACAT<br>TCTGGTGTTTGGGTATGGTCT       | Sal I              |
| Complementation<br>(pCAMBIA1300)                 | ANAC017-com-F      | AAGCTTGCATGCCTGCAGTTTTTC<br>TAACACGGTGAATGTAACAGG       | Pst I              |
|                                                  | ANAC017-com-R      | CATGGTACCCGGGGATCCCTAGT<br>CTTTCAAGAGAAGACTTCTAC        | BamH I             |
| Subcellular localization<br>(35S: P-super-C-GFP) | ANAC017-CGFP-F     | GGGGGACGAGCTCGGTACCATG<br>GCGGATTCTTCACCCGATTTCGT       | Kpn I              |
|                                                  | ANAC017-CGFP-R     | CCTTGCTCACCATGTCGACGTCT<br>TTCAAGAGAAGACTTCTACCT        | Sal I              |
| Subcellular localization<br>(35S: P-super-N-GFP) | NGFP-ANAC017-F     | GAGCTGTACAAGGGTACCATGGC<br>GGATTCTTCACCCGATTTCGT        | Kpn I              |
|                                                  | NGFP-ANAC017-R     | GTCGACTCTAGAGGATCCCTAGT<br>CTTTCAAGAGAAGACTTCTACC       | BmaH I             |
| GUS analysis<br>(pQTY)                           | ANAC017-promoter-F | ATCACTAGTAAAAGGTACCTTTT<br>CTAACACGGTGAATGTAACAGGC      | Kpn I              |
|                                                  | ANAC017-promoter-R | AGATCTACCATGGGGATCCCTAC<br>GTAACAAATCAAACCGATCCCTC      | BmaH I             |
| YH1<br>(pGADT7)                                  | ANAC017-F          | ATGGAGGCCAGTGAATTCATGGC<br>GGATTCTTCACCCGATTTCGT        | EcoR I             |
|                                                  | ANAC017-R          | AGCTCGAGCTCGATGGATCCCTA<br>GTCTTTCAAGAGAAGACTTCTAC<br>C | BmaH I             |
| promoter for YH1<br>(pAbAi)                      | XTH31-promoter-F   | AAGCTTGAATTCGAGCTCCACTA<br>AGAAACTGATAGAGTAATTG         | Sac I              |
|                                                  | XTH31-promoter-R   | CATGCCTCGAGGTCGACTTTTGA<br>GTGAAGTAAAACCTTTTGA          | Sal I              |
|                                                  | XTH17-promoter-F   | AAGCTTGAATTCGAGCTCGCTGC<br>AGAAGCTACGTGATGAGAAC         | Sac I              |
|                                                  | XTH17-promoter-R   | CATGCCTCGAGGTCGACTTTGT<br>CTCACAGGAGTATTGATAT           | Sal I              |
|                                                  | XTH15-promoter-F   | AAGCTTGAATTCGAGCTCAAAC<br>TTATGTTACCGTAAACCCGT          | Sac I              |
|                                                  | XTH15-promoter-R   | CATGCCTCGAGGTCGACTTGGGT                                 | Sal I              |

|                                                    |                         |                                                                                |                      |
|----------------------------------------------------|-------------------------|--------------------------------------------------------------------------------|----------------------|
|                                                    |                         | TTGGTTGATAGAAATGAAA                                                            |                      |
| Transcription<br>activation<br>(pGBKT7)            | Plasmid a,b-F           | TCAGAGGAGGACCTGCATATGAT<br>GGCGGATTCTTCACCCGATTTCGT                            | Nde I                |
|                                                    | Plasmid c-F             | TCAGAGGAGGACCTGCATATGGC<br>TCCAGGGTTTCGATTTCATCCAA                             | Nde I                |
|                                                    | Plasmid d-F             | TCAGAGGAGGACCTGCATATGGA<br>TGAAGATGAACTAGGGAGATGA                              | Nde I                |
|                                                    | Plasmid b,c-R           | ATGCGGCCGCTGCAGGTCGACC<br>ATCGTATACTCATGCATCACCCAA                             | Sal I                |
|                                                    | Plasmid a,d-R           | ATGCGGCCGCTGCAGGTCGACGT<br>CTTTCAAGAGAAGACTTCTACT                              | Sal I                |
| LUC analysis<br>(NONE)<br>(190LUC)                 | ANAC017-Infector -<br>F | CTCTAGAACTAGTGGATCCATGG<br>CGGATTCTTCACCCGATTTCGT                              | BmaH I               |
|                                                    | ANAC017-Infector -<br>R | TAAGCTTGATATCGAATTCCTAGT<br>CTTTCAAGAGAAGACTTCTACC                             | EcoR I               |
|                                                    | XTH31- Reporter -F      | GACGGCCAGTGCCAAGCTTCAC<br>TAAGAAACTGATAGAGTAATTG                               | Hind III             |
|                                                    | XTH31- Reporter -R      | GGAAGGGTCTTGCAGATCTTTTT<br>GAGTGAAGTAAAACCTTTTGA                               | Bgl II               |
| Yeast two-hybrid<br>system<br>(pGADT7)<br>(pGBKT7) | pGADT7-ANAC017-<br>F    | ATGGAGGCCAGTGAATTCATGGC<br>GGATTCTTCACCCGATTTCGT                               | EcoR I               |
|                                                    | pGADT7-ANAC017-<br>R    | AGCTCGAGCTCGATGGATCCCTA<br>GTCTTTCAAGAGAAGACTTCTAC                             | BmaH I               |
|                                                    | pGBKT7-WRKY46-<br>F     | C<br>TCAGAGGAGGACCTGCATATGAT<br>GATGATGGAAGAGAACTTGTG                          | Nde I<br>Sal I       |
|                                                    | pGBKT7-WRKY46-<br>R     | A<br>ATGCGGCCGCTGCAGGTCGACCT                                                   | Nde I                |
|                                                    | pGBKT7-STOP1-F          | ACGACCACAACCAATCCTGTCCG<br>TCAGAGGAGGACCTGCATATGAT                             | Sal I                |
|                                                    | pGBKT7-STOP1-R          | GGAAACTGAAGACGATTTGTGC<br>A<br>ATGCGGCCGCTGCAGGTCGACTT<br>AGAGACTAGTATCTGAAACA |                      |
|                                                    | RT-qPCR                 | ANAC017-qPCR-F                                                                 | TGAGGTTCAATGGAAAGGCT |
| ANAC017-qPCR-R                                     |                         | CCAGAAGATGGCACACAAAG                                                           |                      |
| XTH31-qPCR-F                                       |                         | TGTCACTCTTTGGCTCG                                                              |                      |
| XTH31-qPCR-R                                       |                         | ACCTCATCGTGGTCTCC                                                              |                      |
| XTH17-qPCR-F                                       |                         | ACTTCTGTTTCTTCTTGCGGA                                                          |                      |
| XTH17-qPCR-R                                       |                         | AGGATTTGTCGAGCGAGAGAGA                                                         |                      |
| XTH15-qPCR-F                                       |                         | GGCGACTGTTCTTCTGTGACA                                                          |                      |
| XTH15-qPCR-R                                       |                         | TTGGATTTGAAACCTGACCCGG                                                         |                      |
| RAE1-qPCR-F                                        |                         | CCTGATGGTTTGAAGGCGAT                                                           |                      |
| RAE1-qPCR-R                                        | CGAATTGGCGATTGGGTGA     |                                                                                |                      |

|                                    |                      |                         |
|------------------------------------|----------------------|-------------------------|
|                                    | HB7-qPCR-F           | GCTCAGAAAACGAAGAGAACCG  |
|                                    | HB7-qPCR-R           | GCTCCTCAAACCCACCAAATA   |
|                                    | HB12-qPCR-F          | GCAGAGACTAAACGAAGAGATG  |
|                                    | HB12-qPCR-R          | TCTTTCCATTATGCGACTCT    |
|                                    | WRKY46-qPCR-F        | TGCACGTGTCATTTCCTTGAG   |
|                                    | WRKY46-qPCR-R        | AACCTGTATGCCTGCCCA      |
|                                    | WRKY47-qPCR-F        | AAGGGAATCCATGCCTCGC     |
|                                    | WRKY47-qPCR-R        | ACGGGGGAAGAGGATGGTTA    |
|                                    | ALMT1-qPCR-F         | ACTTGAGAGAGCTGAGTGACC   |
|                                    | ALMT1-qPCR-R         | TCTTCTCGGGTCTTCATTCCC   |
|                                    | MATE-qPCR-F          | GCATAGGACTTCGGTTGTGGCA  |
|                                    | MATE-qPCR-R          | CGAACACAAACGCTAAGGCA    |
|                                    | STOP1-qPCR-F         | CCAAGTCCATCTCAAGCTTTTC  |
|                                    |                      | T                       |
|                                    | STOP1-qPCR-R         | TGGGACGTAAAACCTGCGAA    |
|                                    | ALS1-qPCR-F          | TGAGCAGCAAACGGAATCCT    |
|                                    | ALS1-qPCR-R          | CTCGCAAAGCCGTGCATATC    |
|                                    | ALS3-qPCR-F          | CAATCGCCGGAATGTTGGTC    |
|                                    | ALS3-qPCR-R          | TTGCAACGTCGCTTGTCTTG    |
|                                    | STAR1-qPCR-F         | GCCATGCCATCACTTTGGTC    |
|                                    | STAR1-qPCR-R         | AGATCCATCATCGGGGACTC    |
|                                    | TBL27-qPCR-F         | GAACAACGTTGAGAGCGGTT    |
|                                    | TBL27-qPCR-R         | CTTCGTACGGCTTGGTCATG    |
|                                    | ACTIN2-qPCR-F        | GCTGACCGTATGAGCAAAGA    |
|                                    | ACTIN2-qPCR-R        | GATCCACATCTGTTGGAACG    |
|                                    | TUBULIN-qPCR-F       | AAGTCTGGGAAGTGGTT       |
|                                    | TUBULIN-qPCR-R       | CTCCCAATGAGTGACAAA      |
| <i>anac017-1</i><br>identification | SALK_044777-LP       | CTCTTTCCTCAGTGGCAACAG   |
|                                    | SALK_044777-RP       | CAGGGAAGCTTCTGCAAATCTG  |
|                                    | LBb1.3               | ATTTTGCCGATTTTCGGAAC    |
| <i>anac017-2</i><br>identification | SALK_070231-LP       | GACTCATGCTTGCTTGGAGC    |
|                                    | SALK_070231-RP       | AACCAAATAACGGATCCGATC   |
|                                    | LBb1.3               | ATTTTGCCGATTTTCGGAAC    |
| <i>wrky46</i><br>identification    | SALK_1230_H01-LP     | GAGTCTCTTCTCGAAGCTGGG   |
|                                    | SALK_1230_H01-<br>RP | GATCCTTCCCTTTTCGAAGTG   |
|                                    | LBb1.3               | ATTTTGCCGATTTTCGGAAC    |
| <i>stop1</i><br>identification     | SALK_114108-LP       | TCTTAAAGCGGCCATTGGTG    |
|                                    | SALK_114108-RP       | TTAGAGACTAGTATCTGAAACAG |
|                                    |                      | ACTCAC                  |
|                                    | LBb1.3               | ATTTTGCCGATTTTCGGAAC    |

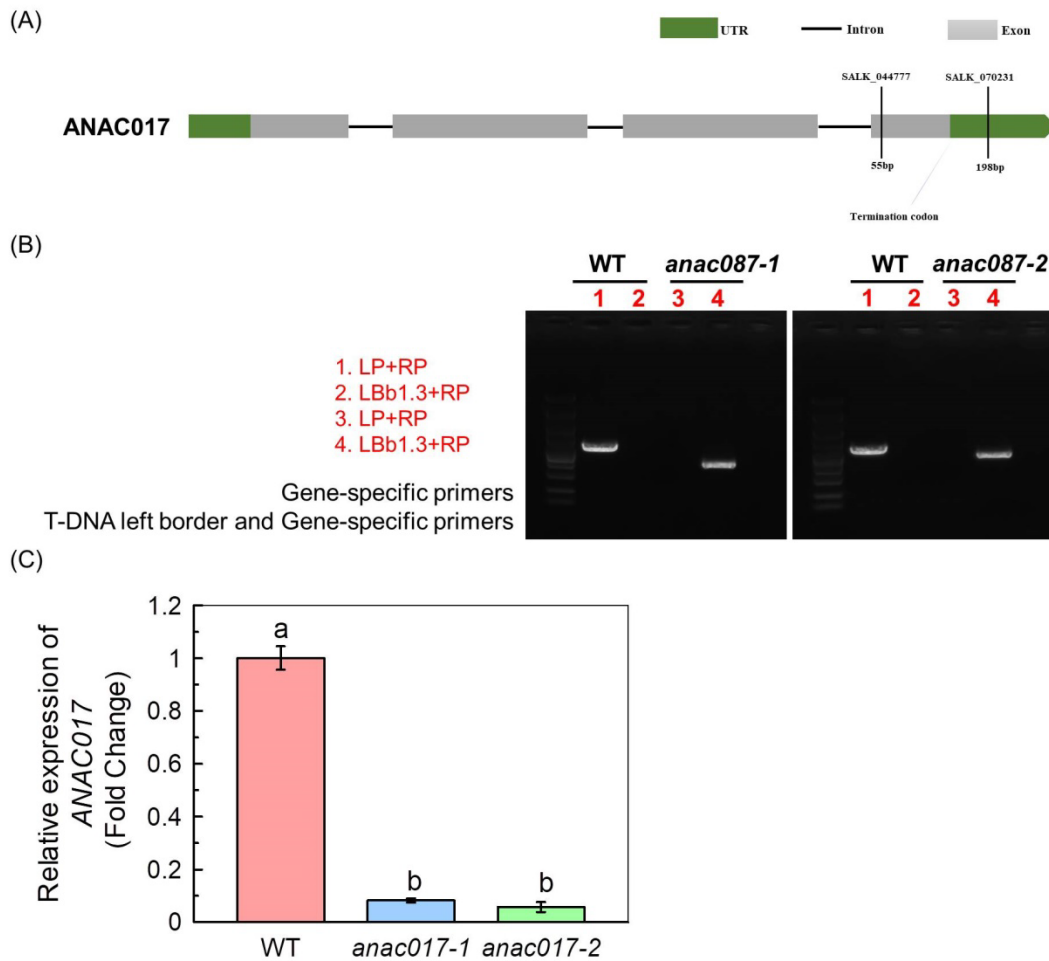

**Supplemental Figure S1.** Identification of the *anac017* mutants. (A) Schematic structure of the *anac017* mutants. The grey box and green box represent exon and untranslated region (UTR), respectively, while the black bold line indicates the intron. (B) Confirmation of the *anac017* mutant alleles by PCR. DNA molecular weight markers are shown in the left lane in each panel. (C) RT-qPCR analysis of the *ANAC017* expression in WT and *anac017* mutant roots. Seedlings were grown on 1/2 MS medium for four weeks, and the RNA was prepared from root tissues. *TUBULIN* was used as an internal control. Data are means  $\pm$  SD (n=4). Different letters above the bars indicate significant differences at  $P < 0.05$  by one-way ANOVA analysis.

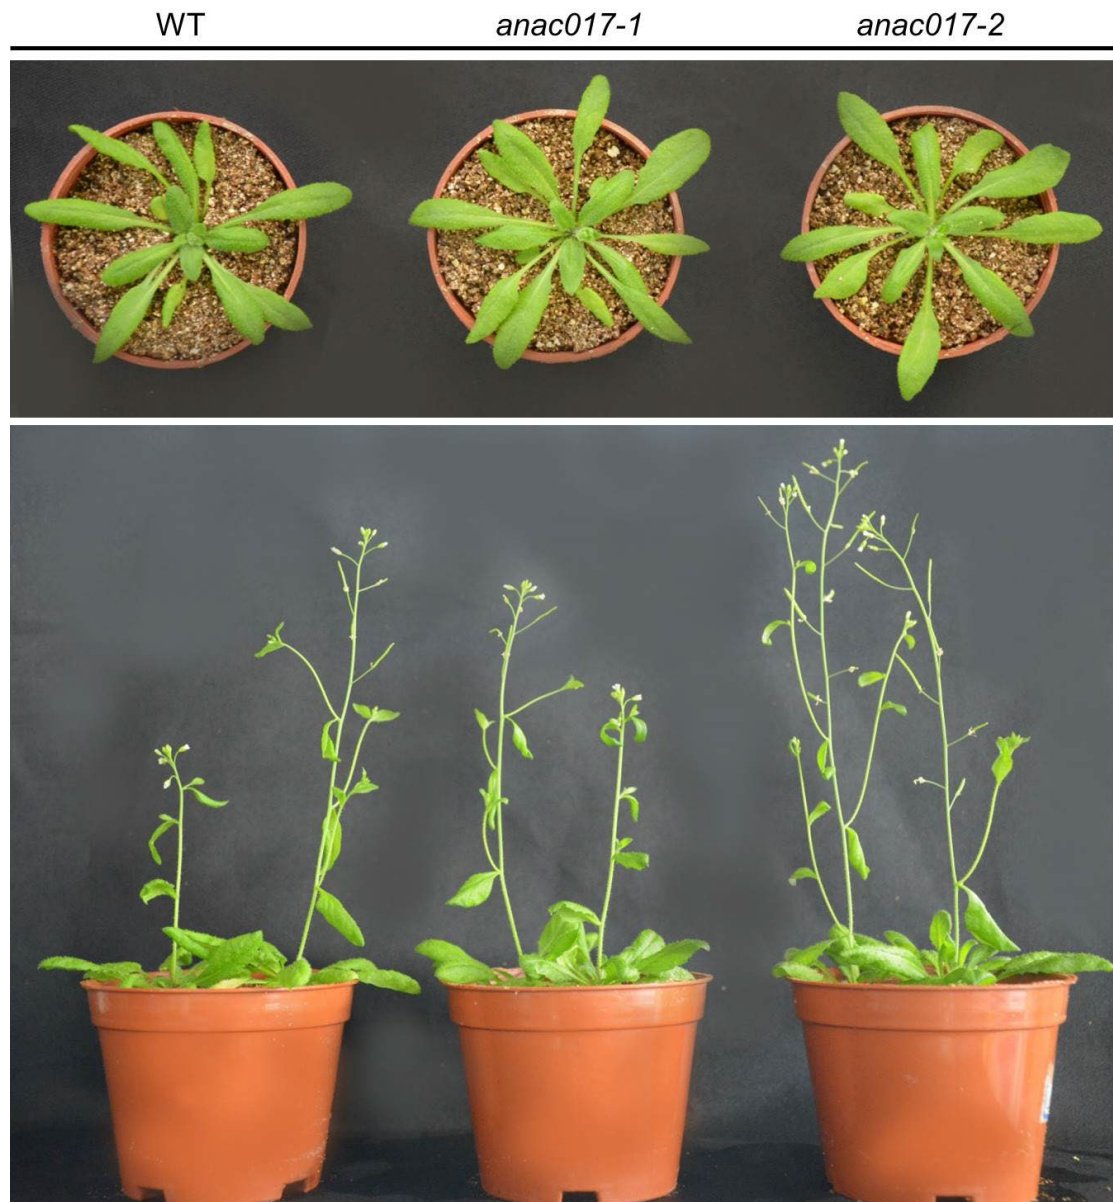

**Supplemental Figure S2.** Phenotype of WT and *anac017* mutants in both vegetative and reproductive stage under normal growth conditions.

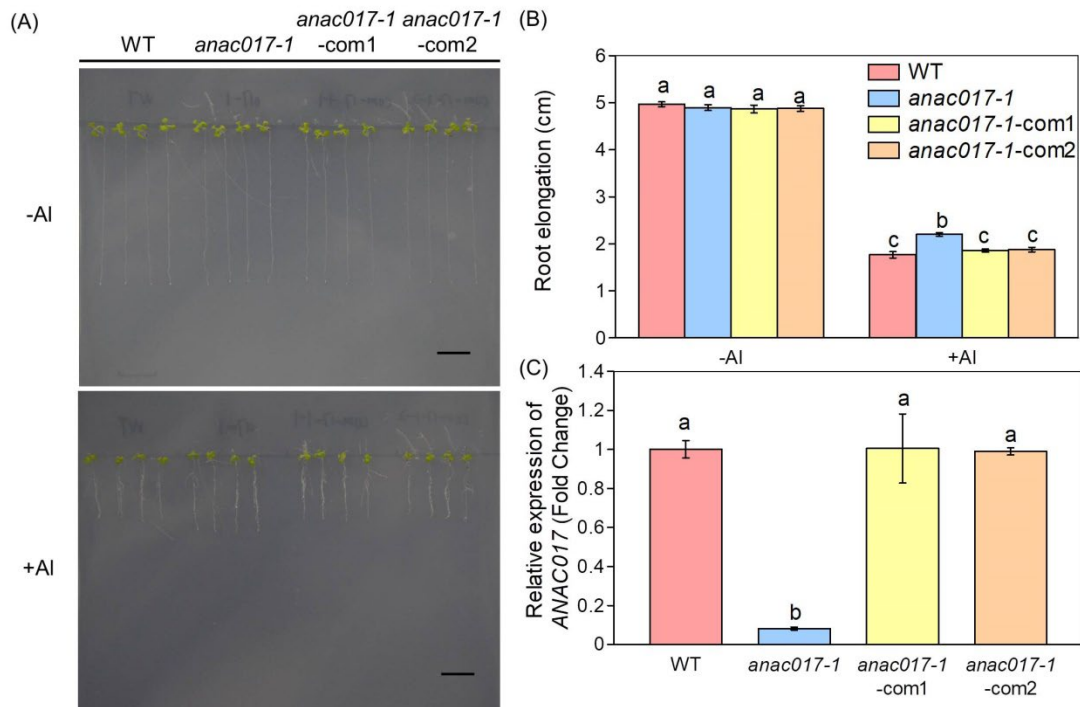

**Supplemental Figure S3.** Phenotypes of WT, *anac017* mutants and *anac017-com* lines (complementary lines). (A) WT, *anac017* mutant (*anac017-1*) and *anac017-com* lines were grown on 1/2 MS medium with or without 200  $\mu$ M AI for 7 days. Seedlings with roots approximately 1 cm long were selected and then transferred to the AI-untreated or AI-treated medium. (B) Root elongation of WT, *anac017-1* and *anac017-1-com* lines in the presence or absence of 200  $\mu$ M AI. Root elongation was measured after treatment as indicated by (A). Data are means  $\pm$  SD (n=4). Different letters above the bars indicate significant differences at  $P < 0.05$  by one-way ANOVA analysis. (C) RT-qPCR analysis of the *ANAC017* expression in WT, *anac017-1* and *anac017-1-com* lines. Seedlings were grown on 1/2 MS medium for four weeks, and the RNA was prepared from root tissues. *TUBULIN* was used as an internal control. Data are means  $\pm$  SD (n=4). Different letters above the bars indicate significant differences at  $P < 0.05$  by one-way ANOVA analysis.

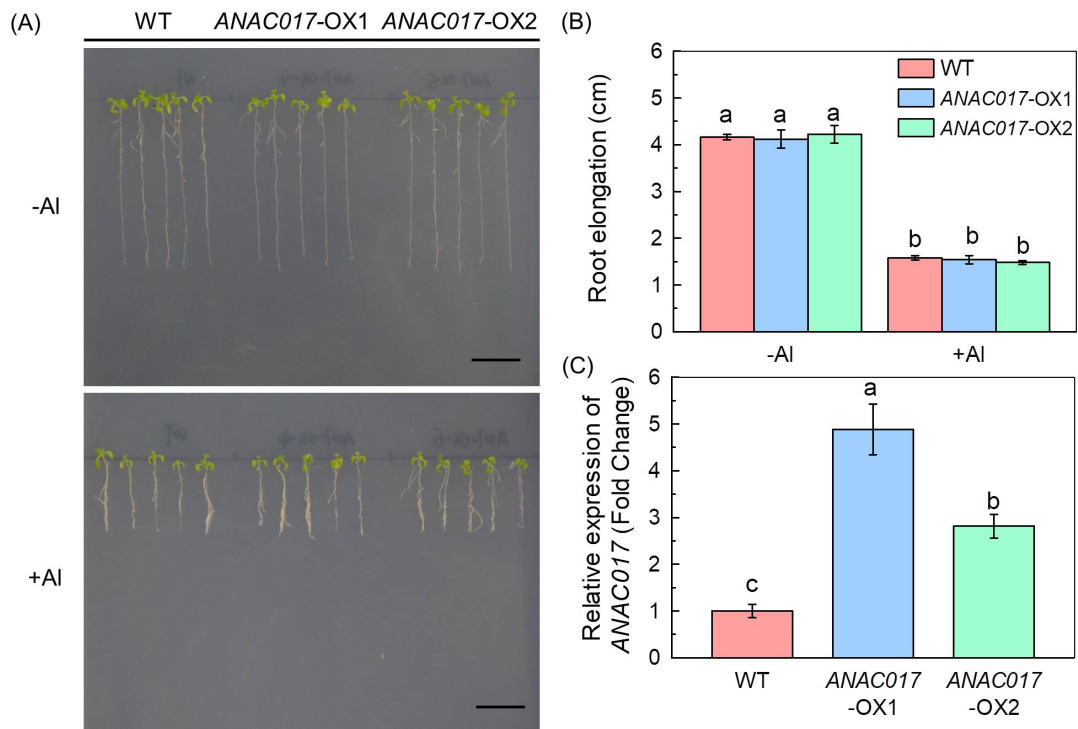

**Supplemental Figure S4.** Phenotypes of WT and *ANAC017* overexpression (*ANAC017-OX*) lines. (A) WT and *ANAC017* overexpression (*ANAC017-OX*) lines were grown on 1/2 MS medium with or without 200  $\mu$ M Al for 7 days. Seedlings with roots approximately 1 cm long were selected and then transferred to the Al-untreated or Al-treated medium. (B) Root elongation of WT and *ANAC017-OX* lines in the presence or absence of 200  $\mu$ M Al. Root elongation was measured after treatment as indicated by (A). Data are means  $\pm$  SD (n=5). Different letters above the bars indicate significant differences at  $P < 0.05$  by one-way ANOVA analysis. (C) RT-qPCR analysis of the *ANAC017* expression in WT and *ANAC017-OX* lines. Seedlings were grown on 1/2 MS medium for four weeks, and the RNA was prepared from root tissues. *TUBULIN* was used as an internal control. Data are means  $\pm$  SD (n=4). Different letters above the bars indicate significant differences at  $P < 0.05$  by one-way ANOVA analysis.

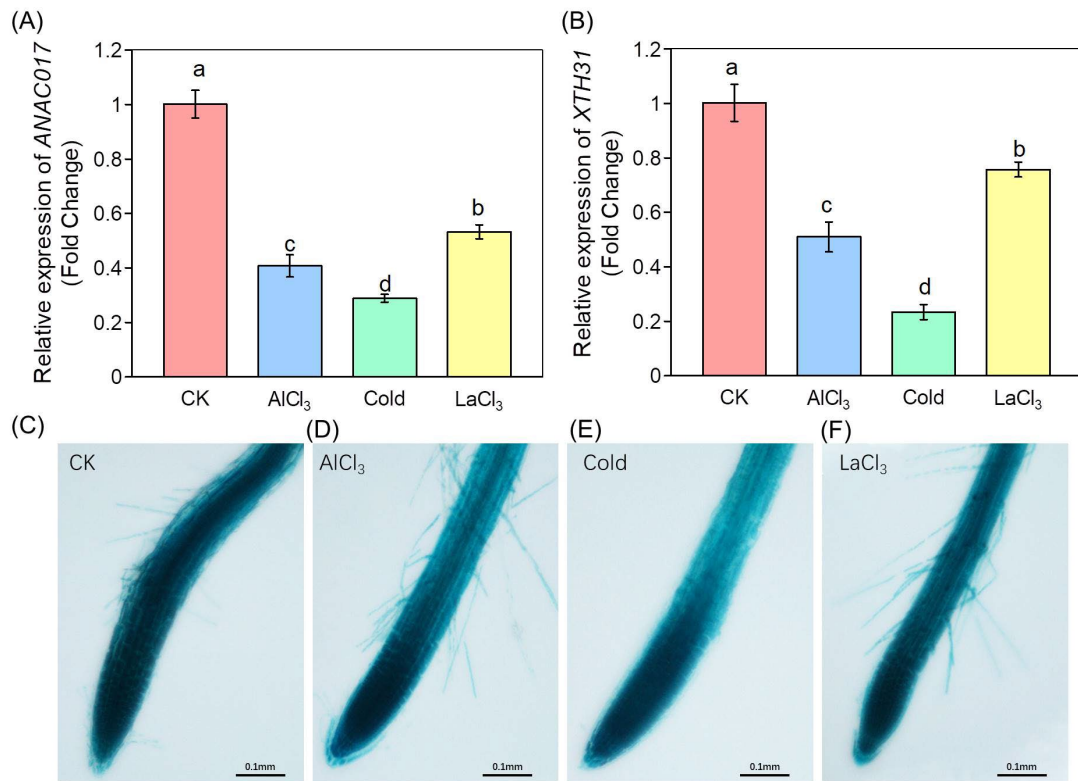

**Supplemental Figure S5.** Expression of *ANAC017* and *XTH31* in response to Al, cold and La stresses. (A-B) RT-qPCR analysis of the expression of *ANAC017* (A) and *XTH31* (B) in WT lines. Four-week-old WT seedlings were treated with or without 50  $\mu$ M Al and 50  $\mu$ M La in the growth chamber with the temperature of 24  $^{\circ}$ C or 4  $^{\circ}$ C for 24 h. RNA was prepared from root tissues. *TUBULIN* was used as an internal control. Data are means  $\pm$  SD (n=4). Different letters above the bars indicate significant differences at  $P < 0.05$  by one-way ANOVA analysis. (C-F) *pANAC017*-GUS seedlings with roots approximately 1 cm long were treated with or without 100  $\mu$ M Al and 100  $\mu$ M La in the growth chamber with the temperature of 24  $^{\circ}$ C or 4  $^{\circ}$ C for 7 days. Roots were subjected to GUS staining. Scale bars, 100  $\mu$ m.



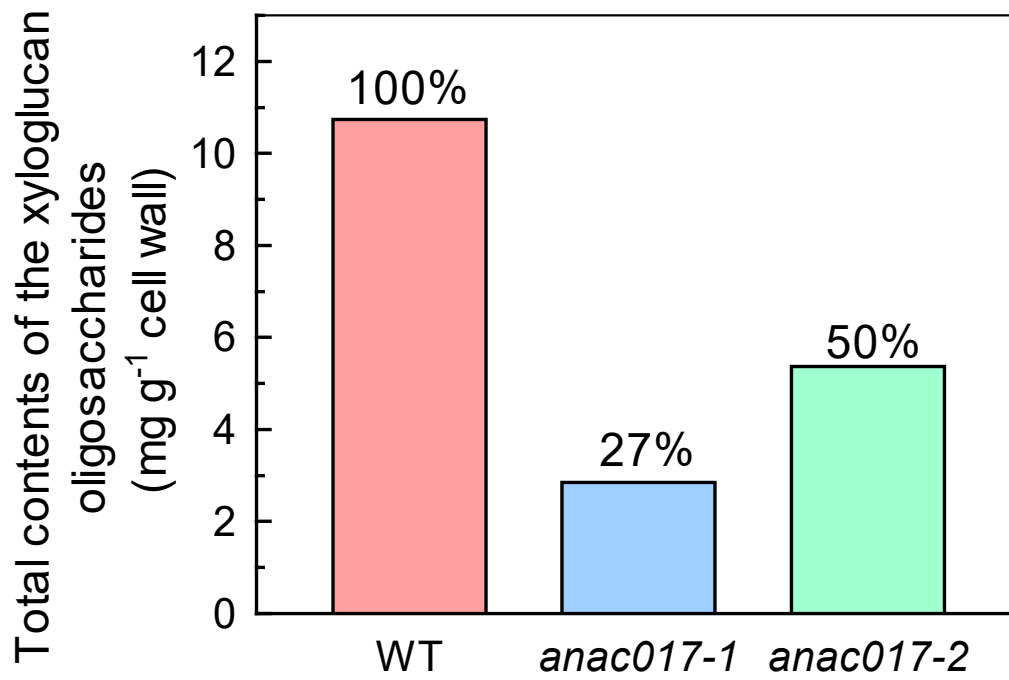

**Supplemental Figure S6.** Total contents of the xyloglucan oligosaccharides by the MALDI-TOF MS analysis. Cell walls were extracted from the roots of Col-0 and *anac017* mutants in the absence of AI and digested with XEG.

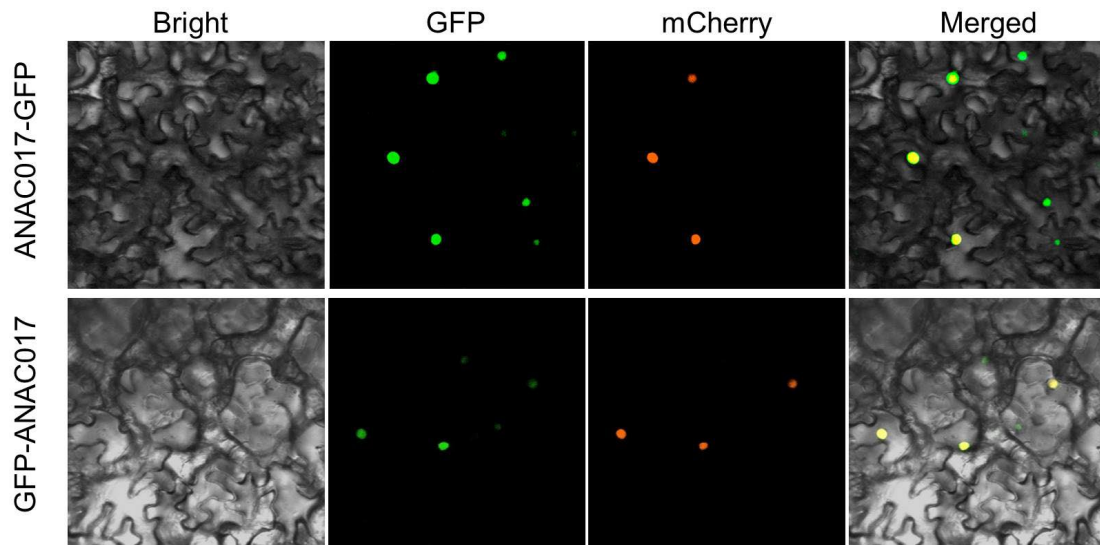

**Supplemental Figure S7.** The subcellular localization of ANAC017 by transient expression into tobacco (*N. benthamiana*) leaves.

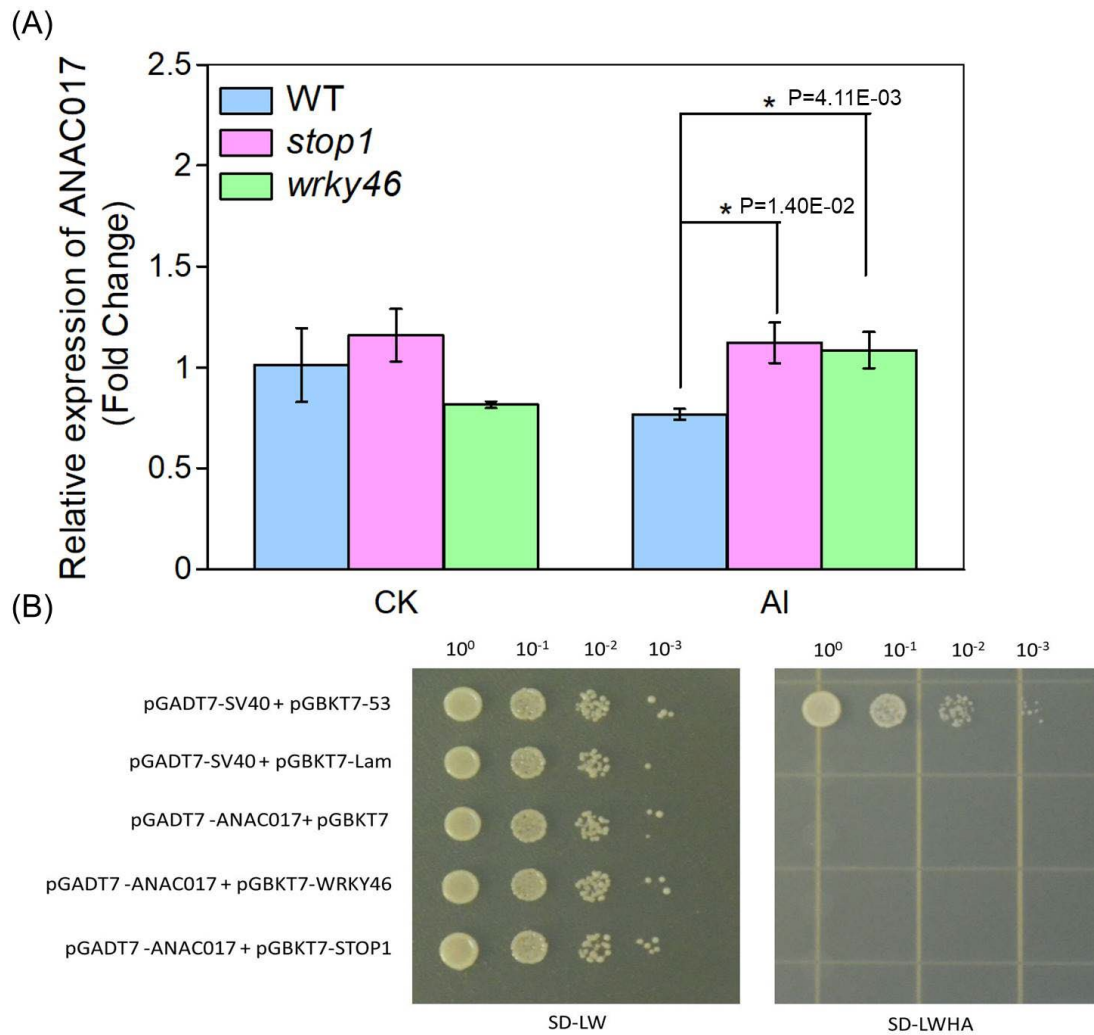

**Supplemental Figure S8.** Relationship between ANAC017 and known AI responsible cascades. (A) The expression *ANAC017* in WT, *stop1* and *wrky46* mutants with or without AI treatment. Seedlings were grown on 1/2 MS medium for four weeks, and the RNA was prepared from root tissues. *TUBULIN* was used as an internal control. Data are means  $\pm$  SD (n=4). Asterisk indicate a significant difference at  $P < 0.05$  by Student's t test. (B) A pair of plasmid pGBKT7-WRKY46, pGBKT7-STOP1 and pGADT7-ANAC017 were introduced into Y2HGold (AH109) and cultured on the synthetically defined (SD) medium lacking leucine, tryptophan, adenine and histidine (SD-LWHA) at 30 °C for 3 d. A pair of plasmids pGADT7-SV40 and pGBKT7-53 were used as the positive control, while a pair of plasmids pGADT7-SV40 and pGBKT7-Lam were used as the negative control.

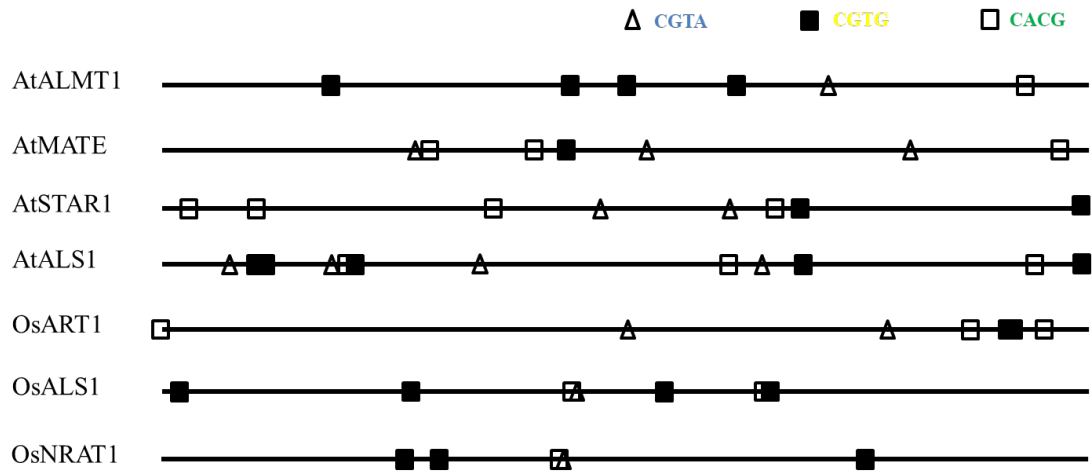

**Supplemental Figure S9.** Occurrence of NACRS in the promoter regions of Al tolerance genes. A stretch of 2 kb upstream of the transcription initiation site was examined. The predicted NACRS-CGTA, CGTG and CACG are represented by triangles, circles and squares, respectively.
